# Supplementary material for: Helical graphene oxide fibers as a stretchable sensor and an electrocapillary sucker
Source: Royal Society of Chemistry journal article supplement (doi:10.1039/c6nr02111e), 2016-01-01
Supplement: c6nr02111e1.pdf [file c6nr02111e1.pdf]

## Supporting Information

### Helical Graphene Oxide Fibers as a Stretchable Sensor and Electrocapillary Sucker

Chunfei Hua, Yuanyuan Shang,\* Xiying Li, Xiaoyang Hu, Ying Wang, Xinchang Wang, Yingjiu Zhang, Xinjian Li, Huiling Duan, Anyuan Cao\*

C. F. Hua, Dr. Y.Y. Shang, Y. Wang, Prof. X. C. Wang, Prof. Y. J Zhang, Prof. X. J. Li  
School of Physical Engineering, Zhengzhou University, Zhengzhou, Henan 450052, China  
E-mail: [yuanyuanshang@zzu.edu.cn](mailto:yuanyuanshang@zzu.edu.cn)

X. Y. Li, Prof. H. L. Duan

Department of Mechanics and Engineering Science, College of Engineering, Peking University,  
Beijing 100871 , P. R .China

Dr. X. Y. Hu

Collage of Science, Henan Institute of Engineering, Zhengzhou, Henan 451191, China

Prof. A. Y. Cao

Department of Materials Science and Engineering, College of Engineering, Peking University,  
Beijing 100871, P. R. China

E-mail:[anyuan@pku.edu.cn](mailto:anyuan@pku.edu.cn)

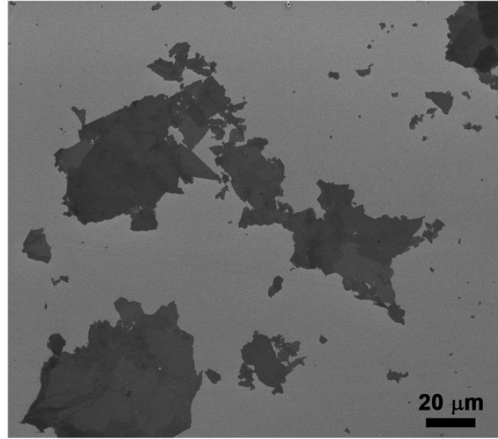

**Figure S1.** SEM images of GO sheets deposited on silica substrate.

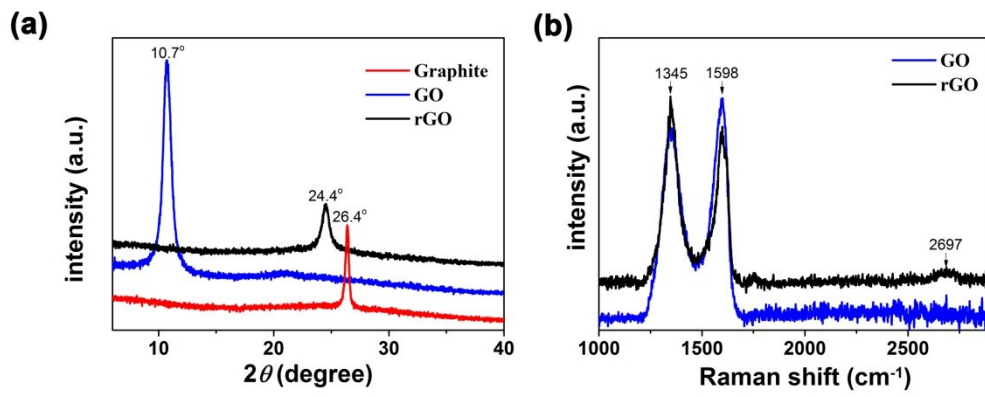

**Figure S2.** (a) XRD spectra of expanded graphite, GO and rGO films. (b) Raman spectra of the GO and rGO films.

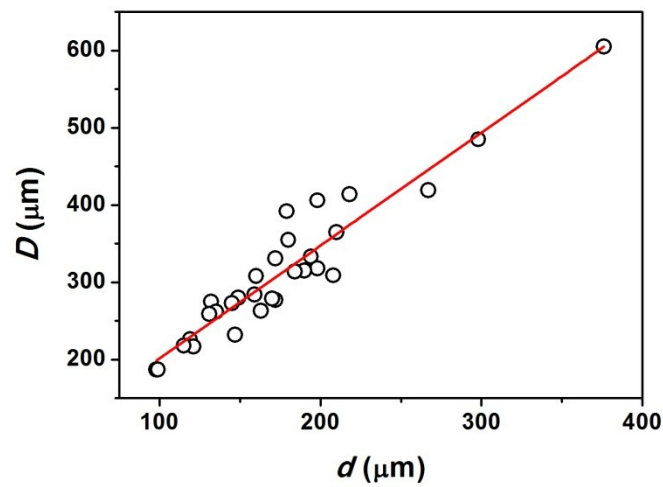

**Figure S3.** Plot of spiral loop diameter ( $D$ ) versus yarn diameter ( $d$ ).

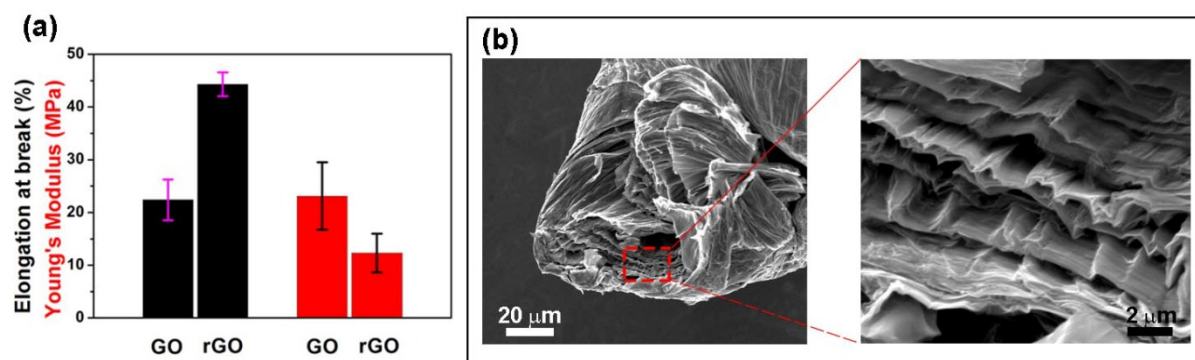

**Figure S4.** (a) Summary of the elongation at break (failure strain) and the Young's modulus (slope of the  $\sigma$ - $\epsilon$  curve) of tested GO and rGO fibers. (b) SEM images of tension-fractured helical rGO fibers, showing flat cross-section indicating a brittle failure following loop separation.
